# Supplementary material for: Development and psychometric validation of a patient-reported outcome measure of recurrent urinary tract infection impact: the Recurrent UTI Impact Questionnaire
Source: Qual Life Res. 2023 Feb 6;32(6):1745–58. doi: 10.1007/s11136-023-03348-7 (PMC10172217; doi:10.1007/s11136-023-03348-7)
Supplement: Supplementary file 2 — Online Resource 2: Concept elicitation literature review (Stage I) (XLSX 28 kb) [file 11136_2023_3348_MOESM2_ESM.xlsx]

## Sheet: Sheet1
Short reference	Full reference	Keywords	rUTI concept(s)
Al-Badr & Al-Shaikh (2013)	Al-Badr, A., & Al-Shaikh, G. (2013). Recurrent Urinary Tract Infections Management in Women: A review. Sultan Qaboos Univ Med J, 13(3), 359-367. https://doi.org/10.12816/0003256	General impact on quality of life, physical symptom burden, social impact and social burden, sleep, daily activities, work, sexual impact, mental health, psychological wellbeing	Patient satisfaction, work and activity interference, personal wellbeing, sexual wellbeing, social wellbeing
Alanazi (2020)	Alanazi, M. Q. (2020). Evaluation of Health-Related Quality of Life in Women with Community-Acquired Urinary Tract Infections Using the EQ-5D-3L in Saudi Arabia. Patient Prefer Adherence, 14, 2419-2426. https://doi.org/10.2147/ppa.S277367	Quality of life, work, activities, mobility, pain, anxiety and depression	Work and activity interference, personal wellbeing, social wellbeing
Albert et al. (2004)	Albert, X., Huertas, I., Pereiro, I., Sanfélix, J., Gosalbes, V., & Perrotta, C. (2004). Antibiotics for preventing recurrent urinary tract infection in non‐pregnant women. Cochrane Database of Systematic Reviews(3). https://doi.org/10.1002/14651858.CD001209.pub2	Treatment options, patient satisfaction, quality of life, antibiotic resistance	Patient satisfaction
Askoy & Yilmaz (2022)	Aksoy, Y. E., & Yılmaz, S. D. (2022). The Effect of Urinary Incontinence Symptoms on Sexual Functions and Quality of Life in Women. Sexuality and Disability, 40(1), 195-207. https://doi.org/10.1007/s11195-021-09714-y	Sexual dysfunction	Sexual wellbeing
Bafna et al. (2020)	Bafna, P., Deepanjali, S., Mandal, J., Balamurugan, N., Swaminathan, R. P., & Kadhiravan, T. (2020). Reevaluating the true diagnostic accuracy of dipstick tests to diagnose urinary tract infection using Bayesian latent class analysis. PLOS ONE, 15(12), e0244870. https://doi.org/10.1371/journal.pone.0244870	Treatment options, diagnostic challenges, testing, clinician understanding, clinician awareness	Patient satisfaction
Baines & Davis (2021)	Baines, G., & Davis, C. (2021). The Impact of Recurrent Urinary Tract Infections on Sexual Function. In A. Rantell (Ed.), Sexual Function and Pelvic Floor Dysfunction: A Guide for Nurses and Allied Health Professionals (pp. 53-64). Springer International Publishing. https://doi.org/10.1007/978-3-030-63843-6_6	Sexual dysfunction, distress, anxiety, avoidance	Sexual wellbeing
Barclay, Veeratterapillay & Harding (2017)	Barclay, J., Veeratterapillay, R., & Harding, C. (2017). Non-antibiotic options for recurrent urinary tract infections in women. BMJ, j5193. https://doi.org/10.1136/bmj.j5193	Non-antibiotic treatment, antibiotic resistance, patient satisfaction	Patient satisfaction
Beerepoot & Geerlings (2016)	Beerepoot, M., & Geerlings, S. (2016). Non-Antibiotic Prophylaxis for Urinary Tract Infections. Pathogens, 5(2), 36. https://doi.org/10.3390/pathogens5020036	Non-antibiotic treatment, antibiotic resistance, patient satisfaction	Patient satisfaction
Boeri et al. (2017)	Boeri, L., Capogrosso, P., Ventimiglia, E., Scano, R., Graziottin, A., Dehò, F., Montanari, E., Montorsi, F., & Salonia, A. (2017). Six Out of Ten Women with Recurrent Urinary Tract Infections Complain of Distressful Sexual Dysfunction – A Case-Control Study. Scientific Reports, 7(1), 44380. https://doi.org/10.1038/srep44380	Sexual dysfunction, distress, anxiety, avoidance	Sexual wellbeing
Boiko, Gulliford & Burgess (2020)	Boiko, O., Gulliford, M. C., & Burgess, C. (2020). Revisiting patient expectations and experiences of antibiotics in an era of antimicrobial resistance: Qualitative study. Health Expectations, 23(5), 1250-1258. https://doi.org/https://doi.org/10.1111/hex.13102	Patient expectations, patient satisfaction, treatment, antibiotic resistance, patient-doctor interactions	Patient satisfaction
Bontempo (2022)	Bontempo, A. C. (2022). The effect of personalized invalidation of symptoms by healthcare providers on patient depression: The mediating role of self-esteem. Patient Education and Counseling. https://doi.org/https://doi.org/10.1016/j.pec.2021.09.034	Patient satisfaction, listening, clinician understanding, dignitiy, respect, patient-doctor interaction	Patient satisfaction
Burnett et al. (2021)	Burnett, L. A., Hochstedler, B. R., Weldon, K., Wolfe, A. J., & Brubaker, L. (2021). Recurrent urinary tract infection: Association of clinical profiles with urobiome composition in women. Neurourology and Urodynamics, 40(6), 1479-1489. https://doi.org/https://doi.org/10.1002/nau.24707	Phenotypes and sexual symptoms, sexual dysfunction, symptom clusters, treatment	Patient satisfaction
Cabral et al. (2019)	Cabral, G. G., Dantas De Souza, A. C., Barbosa, I. R., Jerez-Roig, J., & Souza, D. L. B. (2019). Multimorbidity and Its Impact on Workers: A Review of Longitudinal Studies. Safety and Health at Work, 10(4), 393-399. https://doi.org/10.1016/j.shaw.2019.08.004	Work and activity interference, occupational stress	Work and activity interference
Ciani et al. (2013)	Ciani, O., Grassi, D., & Tarricone, R. (2013). An Economic Perspective on Urinary Tract Infection: The “Costs of Resignation”. Clinical Drug Investigation, 33(4), 255-261. https://doi.org/10.1007/s40261-013-0069-x	Sexual impact, financial burden, psychological burden and withdrawal/resignation, hopelessness	Sexual wellbeing, work and activity interference, personal wellbeing
Colgan, Keating & Dougouih (2004)	Colgan, R., Keating, K., & Dougouih, M. (2004). Survey of Symptom Burden in Women with Uncomplicated Urinary Tract Infections. Clinical Drug Investigation, 24(1), 55-60. https://doi.org/10.2165/00044011-200424010-00007	Symptom burden, personal wellbeing, social impact	Personal wellbeing, social welbeing
Dacheva & Malone-Lee (2012)	Dacheva, T., & Malone-Lee, J. (2012). The problems affecting the diagnosis of urinary tract infection. Aging Health, 8(5), 537-545. https://doi.org/10.2217/ahe.12.53	Diagnostic challenges, patient satisfaction, clinician awareness/understanding of testing and diagnostics, antibiotic resistance, treatment	Patient satisfaction
Dason, Dason & Kapoor (2011)	Dason, S., Dason, J. T., & Kapoor, A. (2011). Guidelines for the diagnosis and management of recurrent urinary tract infection in women. Canadian Urological Association Journal, 316-322. https://doi.org/10.5489/cuaj.11214	Treatment options, diagnostic challenges, testing, clinician understanding, clinician awareness	Patient satisfaction
Di Giacomo et al. (2019)	Di Giacomo, D., Ranieri, J., Nasta, L., Moscato, S., Guerra, F., & Passafiume, D. (2019). Psychological distress in Interstitial Cystitis/Bladder Pain Syndrome: crosssectional study on emotional pattern. Mediterranean Journal of Clinical Psychology, 7(2). https://doi.org/10.6092/2282-1619/2019.7.2135	Psychological wellbeing, personal wellbeing, distress, anxiety, emotional challenge, depression	Personal wellbeing
Dueñas et al. (2016)	Duenas, M., Ojeda, B., Salazar, A., Mico, J. A., & Failde, I. (2016). A review of chronic pain impact on patients, their social environment and the health care system. Journal of Pain Research, Volume 9, 457-467. https://doi.org/10.2147/jpr.s105892	Chronic pain, adjustment, psychological wellbeing, social impact, relationships, anxiety, societal impact	Personal wellbeing, social welbeing, work and activity interference
Eilber & Lee (2020)	Eilber, K. S., & Lee, U. (2020). Wellness and the Genito-Urinary System. In W. W. IsHak (Ed.), The Handbook of Wellness Medicine (pp. 98-115). Cambridge University Press.	Quality of life, personal wellbeing	Personal wellbeing
Flower et al. (2014)	Flower, A., Bishop, F. L., & Lewith, G. (2014). How women manage recurrent urinary tract infections: an analysis of postings on a popular web forum. BMC Family Practice, 15(1), 162. https://doi.org/10.1186/1471-2296-15-162	General impact on quality of life, social impact, relationships, sexual impact, financial impact, societal financial impact, psychological wellbeing, depression, anxiety, work and daily activity disruption, relationships	Patient satisfaction, work and activity interference, personal wellbeing, sexual wellbeing, social wellbeing
Flower et al. (2015)	Flower, A., Winters, D., Bishop, F. L., & Lewith, G. (2015). The challenges of treating women with recurrent urinary tract infections in primary care: a qualitative study of GPs’ experiences of conventional management and their attitudes towards possible herbal options. Primary Health Care Research &amp; Development, 16(6), 597-606. https://doi.org/10.1017/S1463423615000201	Clinician education, clinician awareness, clinician understanding, UTI diagnosis, antibiotic resistance	Patient satisfaction
Flower et al. (2016)	Flower, A., Harman, K., Lewith, G., Moore, M., Bishop, F. L., Stuart, B., & Lampert, N. (2016). Standardised Chinese herbal treatment delivered by GPs compared with individualised treatment administered by practitioners of Chinese herbal medicine for women with recurrent urinary tract infections (RUTI): study protocol for a randomised controlled trial. Trials, 17(1), 358. https://doi.org/10.1186/…	Patient satisfaction, quality of life, treatment options, financial costs	Patient satisfaction, work and activity interference
Forbes et al. (2018)	Forbes, R., Ali, A., Abouhajar, A., Brennand, C., Brown, H., Carnell, S., Chadwick, T., Eardley, I., Lecouturier, J., Mossop, H., Pearce, I., Pickard, R., Thiruchelvam, N., Walton, K., Wilkinson, J., & Harding, C. (2018). ALternatives To prophylactic Antibiotics for the treatment of Recurrent urinary tract infection in women (ALTAR): study protocol for a multicentre, pragmatic, patient-randomised…	Treatment options, patient satisfaction, quality of life, antibiotic resistance	Patient satisfaction
Foxman (2014)	Foxman, B. (2014). Urinary tract infection syndromes: occurrence, recurrence, bacteriology, risk factors, and disease burden. Infect Dis Clin North Am, 28(1), 1-13. https://doi.org/10.1016/j.idc.2013.09.003	Burden, psychological wellbeing, social impact, work impact, daily activities	Personal wellbeing, social welbeing, work and activity interference
Foxman et al. (2001)	Foxman, B., Somsel, P., Tallman, P., Gillespie, B., Raz, R., Colodner, R., Kandula, D., & Sobel, J. D. (2001). Urinary tract infection among women aged 40 to 65: Behavioral and sexual risk factors. Journal of Clinical Epidemiology, 54(7), 710-718. https://doi.org/https://doi.org/10.1016/S0895-4356(00)00352-8	Sexual dysfunction, sex as cause of UTI	Sexual wellbeing
François et al. (2016)	François, M., Hanslik, T., Dervaux, B., Le Strat, Y., Souty, C., Vaux, S., Maugat, S., Rondet, C., Sarazin, M., Heym, B., Coignard, B., & Rossignol, L. (2016). The economic burden of urinary tract infections in women visiting general practices in France: a cross-sectional survey. BMC Health Services Research, 16(1), 365. https://doi.org/10.1186/s12913-016-1620-2	Societal impact, financial impact, work, employment, absenteeism, presenteeism	Work and activity interference
Franssen et al. (2021)	Franssen, M., Cook, J., Robinson, J., Williams, N., Glogowska, M., Yang, Y., Allen, J., Butler, C. C., Thomas, N., Hay, A., Moore, M., & Hayward, G. (2021). D-MannosE to prevent Recurrent urinary tract InfecTions (MERIT): protocol for a randomised controlled trial. BMJ Open, 11(1), e037128. https://doi.org/10.1136/bmjopen-2020-037128	Treatment options, patient satisfaction, quality of life	Patient satisfaction
Gasiorek, Hsieh & Forster (2019)	Gasiorek, M., Hsieh, M. H., & Forster, C. S. (2019). Utility of DNA Next-Generation Sequencing and Expanded Quantitative Urine Culture in Diagnosis and Management of Chronic or Persistent Lower Urinary Tract Symptoms. Journal of Clinical Microbiology, 58(1). https://doi.org/10.1128/jcm.00204-19	Testing methods, diagnostic challenges, patient satisfaction	Patient satisfaction
Gonzalez et al. (2022)	Gonzalez, G., Vaculik, K., Khalil, C., Zektser, Y., Arnold, C., Almario, C. V., Spiegel, B., & Anger, J. (2022). Using Large-scale Social Media Analytics to Understand Patient Perspectives About Urinary Tract Infections: Thematic Analysis. J Med Internet Res, 24(1), e26781. https://doi.org/10.2196/26781	General impact on quality of life, social impact, relationships, sexual impact, financial impact, societal financial impact, psychological wellbeing, depression, anxiety, work and daily activity disruption, relationships	Patient satisfaction, work and activity interference, personal wellbeing, sexual wellbeing, social wellbeing
Gopinath et al. (2020)	Gopinath, S., Anjui, P. C., John Wesley, I., & Prasobh, G. R. (2020). A study to evaluate the impact of patient counselling on the quality of life of female patients with recurrent urinary tract infection. International Journal of Basic & Clinical Pharmacology, 9(12), 1871-1876. https://doi.org/https://dx.doi.org/10.18203/2319-2003.ijbcp20205125	Quality of life, personal wellbeing, hopelessness, depression, anxiety	Personal wellbeing
Graziottin (2014)	Graziottin, A. (2014). Recurrent cystitis after intercourse: What the gynaecologist has to say. In J. Studd, L. T. Seang, & F. A. Chervenak (Eds.), Current Progress in Obstetrics and Gynaecology (Vol. 2, pp. 319-336). LifeTree Media.	Sexual dysfunction	Sexual wellbeing
Grigoyran et al. (2019)	Grigoryan, L., Nash, S., Zoorob, R., Germanos, G. J., Horsfield, M. S., Khan, F. M., Martin, L., & Trautner, B. W. (2019). Qualitative Analysis of Primary Care Provider Prescribing Decisions for Urinary Tract Infections. Antibiotics, 8(2), 84. https://www.mdpi.com/2079-6382/8/2/84	Patient satisfaction, clinician decisions, clinician awareness, antibiotic resistance	Patient satisfaction
Grigoyran et al. (2022)	Grigoryan, L., Mulgirigama, A., Powell, M., & Schmiemann, G. (2022). The emotional impact of urinary tract infections in women: a qualitative analysis. BMC Women's Health, 22(1), 182. https://doi.org/10.1186/s12905-022-01757-3	Psychological wellbeing, personal wellbeing, social impact, sexual wellbeing, work and activity inteference, quality of life, distress	Patient satisfaction, work and activity interference, personal wellbeing, sexual wellbeing, social wellbeing
Gupta et al. (2001)	Gupta, K., Hooton, T. M., Roberts, P. L., & Stamm, W. E. (2001). Patient-Initiated Treatment of Uncomplicated Recurrent Urinary Tract Infections in Young Women. Annals of Internal Medicine, 135(1), 9-16. https://doi.org/10.7326/0003-4819-135-1-200107030-00004 %m 11434727	Patient-initiated treatment, patient convenience, individualised care, patient satisfaction	Patient satisfaction
Haddad et al. (2020)	Haddad, J. M., Ubertazzi, E., Cabrera, O. S., Medina, M., Garcia, J., Rodriguez-Colorado, S., Toruno, E., Matsuoka, P. K., & Castillo-Pino, E. (2020). Latin American consensus on uncomplicated recurrent urinary tract infection—2018. International Urogynecology Journal, 31(1), 35-44. https://doi.org/10.1007/s00192-019-04079-5	Quality of life impact, patient satisfaction, treatment options	Patient satisfaction
Harding et al. (2019)	Harding, C., Rantell, A., Cardozo, L., Jacobson, S. K., Anding, R., Kirschner‐Hermanns, R., Greenwell, T., Swamy, S., Malde, S., & Abrams, P. (2019). How can we improve investigation, prevention and treatment for recurrent urinary tract infections – ICI‐RS 2018. Neurourology and Urodynamics, 38(S5). https://doi.org/10.1002/nau.24021	Patient satisfaction, clinician decisions, clinician awareness, antibiotic resistance, patient-doctor interaction, frustration	Patient satisfaction
Hatchett et al. (1997)	Hatchett, L., Friend, R., Symister, P., & Wadhwa, N. (1997). Interpersonal expectations, social support, and adjustment to chronic illness [doi:10.1037/0022-3514.73.3.560]. American Psychological Association.	Adjustment, chronic illness, psychological burden, wellbeing, social impact	Personal wellbeing, social welbeing
Hearn et al. (2018)	Hearn, J. H., Selvarajah, S., Kennedy, P., & Taylor, J. (2018). Stigma and self-management: an Interpretative Phenomenological Analysis of the impact of chronic recurrent urinary tract infections after spinal cord injury. Spinal Cord Series and Cases, 4(1). https://doi.org/10.1038/s41394-018-0042-2	Stigma, blame, personal wellbeing, anxiety, embarrassment, social impact	Personal wellbeing
Hughes et al. (2020)	Hughes, F. M., Hirshman, N. A., Malick, H. A., White, S. W., Jin, H., Harper, S. N., & Purves, J. T. (2020). A possible mechanism underlying mood disorders associated with LUTS: Chronic bladder outlet obstruction causes NLRP3‐dependent inflammation in the hippocampus and depressive behavior in rats. Neurourology and Urodynamics, 39(6), 1700-1707. https://doi.org/10.1002/nau.24448	Depression, mental health, low mood, personal wellbeing	Personal wellbeing
Izett-Kay et al. (2022)	Izett-Kay, M., Barker, K. L., McNiven, A., & Toye, F. (2022). Experiences of urinary tract infection: A systematic review and meta-ethnography. Neurourology and Urodynamics, 41(3), 724-739. https://doi.org/https://doi.org/10.1002/nau.24884	General impact on quality of life, physical symptom burden, social impact and social burden, sleep, daily activities, work, sexual impact, mental health, psychological wellbeing, misdiagnosis, patient satisfaction, inaccurate diagnosis, treated with dignity, respect, antibiotic resistance, hopelessness, frustration, patient pathways, stigmatisation, challenges around definitions of 'acute' vs 're…	Patient satisfaction, work and activity interference, personal wellbeing, sexual wellbeing, social wellbeing
Javaheri Tehrani et al. (2014)	Javaheri Tehrani, F., Nikpour, S., Haji Kazemi, E. A., Sanaie, N., & Shariat Panahi, S. A. (2014). The effect of education based on health belief model on health beliefs of women with urinary tract infection. Int J Community Based Nurs Midwifery, 2(1), 2-11.	Patient satisfaction, patient understanding, attitudes and health beliefs	Patient satisfaction
Kanter et al. (2017)	Kanter, G., Volpe, K. A., Dunivan, G. C., Cichowski, S. B., Jeppson, P. C., Rogers, R. G., & Komesu, Y. M. (2017). Important role of physicians in addressing psychological aspects of interstitial cystitis/bladder pain syndrome (IC/BPS): a qualitative analysis. International Urogynecology Journal, 28(2), 249-256. https://doi.org/10.1007/s00192-016-3109-2	Psychological wellbeing, personal wellbeing, distress, anxiety, emotional challenge, depression	Personal wellbeing
Kelleher & Cardozo (1993)	Kelleher, C. J., & Cardozo, L. D. (1993). Sex and the bladder. Sexual and Marital Therapy, 8(3), 231-241. https://doi.org/10.1080/02674659308404970	Sexual dysfunction, social impact, intimate relationships, sexual anxiety, avoidance, sex as cause of UTI	Sexual wellbeing
Kim et al. (2015)	Kim, T. H., Han, D. H., Ryu, D. S., & Lee, K. S. (2015). The Impact of Lower Urinary Tract Symptoms on Quality of Life, Work Productivity, Depressive Symptoms, and Sexuality in Korean Men Aged 40 Years and Older: A Population-Based Survey. Int Neurourol J, 19(2), 120-129. https://doi.org/10.5213/inj.2015.19.2.120	Quality of life, depression, sexual impact, sexual wellbeing in males, sexual satisfaction, enjoyment, anxiety, work impact, daily activities	Sexual wellbeing, work and activity interference, personal wellbeing
Krishnaswamy & Basu (2020)	Krishnaswamy, P. H., & Basu, M. (2020). Urinary tract infection in gynaecology and obstetrics. Obstetrics, Gynaecology & Reproductive Medicine, 30(9), 276-282. https://doi.org/https://doi.org/10.1016/j.ogrm.2020.06.002	Personal wellbeing, burden, societal burden, financial implications, patient satisfaction	Personal wellbeing, patient satisfaction, social impact
Lecky et al. (2020)	Lecky, D. M., Howdle, J., Butler, C. C., & McNulty, C. A. (2020). Optimising management of UTIs in primary care: a qualitative study of patient and GP perspectives to inform the development of an evidence-based, shared decision-making resource. British Journal of General Practice, 70(694), e330-e338. https://doi.org/10.3399/bjgp20x708173	Patient satisfaction, clinician decisions, clinician awareness, antibiotic resistance	Patient satisfaction
Leydon et al. (2010)	Leydon, G. M., Turner, S., Smith, H., & Little, P. (2010). Women’s views about management and cause of urinary tract infection: qualitative interview study. BMJ, 340, c279. https://doi.org/10.1136/bmj.c279	Management of rUTI, diagnosis, treatment, patient satisfaction	Patient satisfaction
Lugtenberg et al. (2010)	Lugtenberg, M., Burgers, J. S., Zegers-Van Schaick, J. M., & Westert, G. P. (2010). Guidelines on uncomplicated urinary tract infections are difficult to follow: perceived barriers and suggested interventions. BMC Family Practice, 11(1), 51. https://doi.org/10.1186/1471-2296-11-51	Barriers to healthcare, patient satisfaction, clinician decisions, clinician awareness, antibiotic resistance	Patient satisfaction
Malone-Lee (2017)	Malone-Lee, J. (2017). Urinary infections are complex and hard to treat. BMJ, j5766. https://doi.org/10.1136/bmj.j5766	Barriers to healthcare, patient satisfaction, clinician decisions, clinician awareness, antibiotic resistance, treatment options	Patient satisfaction
Maxwell et al. (2021)	Maxwell, K., Roberts, L., Kramer, M., & Finlay, K. (2021). Using the Working Model of Adjustment to Chronic Illness to explain the burden of recurrent urinary tract infection: A survey-based study. International Journal of Pharmacy Practice, 29(Supplement_1), i5-i6. https://doi.org/10.1093/ijpp/riab016.006	General impact on quality of life, physical symptom burden, social impact and social burden, sleep, daily activities, work, sexual impact, mental health, psychological wellbeing, misdiagnosis, patient satisfaction, inaccurate diagnosis, adjustment, chronic pain, burden	Patient satisfaction, work and activity interference, personal wellbeing, sexual wellbeing, social wellbeing
McAllister et al. (2012)	McAllister, M., Dunn, G., Payne, K., Davies, L., & Todd, C. (2012). Patient empowerment: The need to consider it as a measurable patient-reported outcome for chronic conditions. BMC Health Services Research, 12(1), 157. https://doi.org/10.1186/1472-6963-12-157	Patient satisfaction, patient empowerment, patient understanding, chronic illness	Patient satisfaction
McClurg et al. (2018)	McClurg, D., Walker, K., Pickard, R., Hilton, P., Ainsworth, H., Leonard, K., Suresh, S., Nilsson, A., & Gillespie, N. (2018). Participant experiences of clean intermittent self-catheterisation, urinary tract infections and antibiotic use on the ANTIC trial – A qualitative study. International Journal of Nursing Studies, 81, 1-7. https://doi.org/https://doi.org/10.1016/j.ijnurstu.2018.01.012	Antibiotic resistance, antibiotic use, treatment access, treatment options, patient satisfaction, catheterisation, emotional burden, personal wellbeing, psychological wellbeing, depression, patient understanding of treatment	Patient satisfaction, personal wellbeing
McGowan et al. (2010)	McGowan, L., Escott, D., Luker, K., Creed, F., & Chew-Graham, C. (2010). Is chronic pelvic pain a comfortable diagnosis for primary care practitioners: a qualitative study. BMC Family Practice, 11(1), 7. https://doi.org/10.1186/1471-2296-11-7	Chronic pain, diagnostic issues, patient satisfaction	Patient satisfaction
McKernan et al. (2020)	McKernan, L. C., Bonnet, K. R., Finn, M. T. M., Williams, D. A., Bruehl, S., Reynolds, W. S., Clauw, D., Dmochowski, R. R., Schlundt, D. G., & Crofford, L. J. (2020). Qualitative analysis of treatment needs in interstitial cystitis/bladder pain syndrome: Implications for intervention. Canadian Journal of Pain, 4(1), 181-198. https://doi.org/10.1080/24740527.2020.1785854	Patient satisfaction, clinician decisions, clinician awareness, patient-doctor interaction, frustration	Patient satisfaction
Medina & Castillo-Piño (2019)	Medina, M., & Castillo-Pino, E. (2019). An introduction to the epidemiology and burden of urinary tract infections. Therapeutic Advances in Urology, 11, 175628721983217. https://doi.org/10.1177/1756287219832172	Psychological wellbeing, personal wellbeing, social impact, sexual wellbeing, work and activity inteference, quality of life, distress	Personal wellbeing, social wellbeing, sexual wellbeing, work and activity interference
Minardi et al. (2011)	Minardi, D., d'Anzeo, G., Cantoro, D., Conti, A., & Muzzonigro, G. (2011). Urinary tract infections in women: etiology and treatment options. Int J Gen Med, 4, 333-343. https://doi.org/10.2147/ijgm.S11767	Clinician education, clinician awareness, clinician understanding, UTI diagnosis	Patient satisfaction
Mondal, Noori & Pal (2022)	Mondal, S., Noori, M. T., & Pal, D. K. (2022). Sexual dysfunction in female patients of reproductive age group with recurrent urinary tract infection—a cross-sectional study. AJOG Global Reports, 2(4), 100083. https://doi.org/https://doi.org/10.1016/j.xagr.2022.100083	Sexual dysfunction	Sexual wellbeing
Moskowitz & Lee (2018)	Moskowitz, D., & Lee, U. (2018). Patient Distress in Women with Recurrent Urinary Tract Infections: How Can Physicians Better Meet Patients Needs? Current Urology Reports, 19(12), 97. https://doi.org/10.1007/s11934-018-0849-1	Patient distress, patient satisfaction, clinician attitudes	Patient satisfaction
Naber, Bonkat & Wagenlehner (2020)	Naber, K. G., Bonkat, G., & Wagenlehner, F. M. E. (2020). The EAU and AUA/CUA/SUFU Guidelines on Recurrent Urinary Tract Infections: What is the Difference? European Urology, 78(5), 645-646. https://doi.org/10.1016/j.eururo.2020.06.032	Clinician education, clinician awareness, clinician understanding, UTI diagnosis	Patient satisfaction
Naber, Tirán-Sauceado & Wagenlehner (2022)	Naber, K. G., Tirán-Saucedo, J., & Wagenlehner, F. M. E. (2022). Psychosocial burden of recurrent uncomplicated urinary tract infections. GMS Infect Dis, 10, Doc01. https://doi.org/10.3205/id000078	General impact on quality of life, social impact, relationships, sexual impact, financial impact, societal financial impact, psychological wellbeing, depression, anxiety, work and daily activity disruption	Personal wellbeing, social wellbeing, sexual wellbeing, work and activity interference
Nelson et al. (2016)	Nelson, C. P., Hoberman, A., Shaikh, N., Keren, R., Mathews, R., Greenfield, S. P., Mattoo, T. K., Gotman, N., Ivanova, A., Moxey-Mims, M., Carpenter, M. A., & Chesney, R. W. (2016). Antimicrobial Resistance and Urinary Tract Infection Recurrence. PEDIATRICS, 137(4), e20152490-e20152015. https://doi.org/10.1542/peds.2015-2490	Antibiotic resistance, antibiotic use, treatment access, treatment options, patient satisfaction	Patient satisfaction
NHS (2022)	NHS. (2022). Urinary tract infections (UTIs). Retrieved 01/04/2022 from https://www.nhs.uk/conditions/urinary-tract-infections-utis/	Symptom burden	Patient satisfaction
NHS Business Authority (2021)	NHS Business Authority. (2021). Antimicrobial stewardship: RightCare UTI Focus Pack.	Treatment options, patient satisfaction, quality of life, antibiotic resistance	Patient satisfaction
NICE (2015)	NICE. (2015). Quality standard: Urinary tract infections in adults (QS90). https://www.nice.org.uk/guidance/qs90	Symptom burden, personal wellbeing, antibiotic resistance, patient satisfaction	Personal wellbeing, patient satisfaction
NICE (2021)	NICE. (2021). Urinary tract infection (lower) - women. Retrieved 01/04/2022 from https://cks.nice.org.uk/topics/urinary-tract-infection-lower-women/	Symptom burden, personal wellbeing, antibiotic resistance, patient satisfaction	Personal wellbeing, patient satisfaction
Nicolle & Ronald (1987)	Nicolle, L. E., & Ronald, A. R. (1987). Recurrent Urinary Tract Infection in Adult Women: Diagnosis and Treatment. Infectious Disease Clinics of North America, 1(4), 793-806. https://doi.org/https://doi.org/10.1016/S0891-5520(20)30150-1	Diagnostic challenges, patient satisfaction	Patient satisfaction
Nightingale et al. (2018)	Nightingale, G., Shehab, Q., Kandiah, C., Rush, L., Rowe-Jones, C., & Phillips, C. H. (2018). The effect of intravesical instillations with Hyaluronic Acid on sexual dysfunction in women with recurrent urinary tract infections (RUTI). European Journal of Obstetrics & Gynecology and Reproductive Biology, 221, 105-108. https://doi.org/https://doi.org/10.1016/j.ejogrb.2017.12.029	Sexual dysfunction	Sexual wellbeing
NIHR (2016)	NIHR. (2016). Point-of-care testing for urinary tract infections (Horizon Scan Report 0045). https://www.community.healthcare.mic.nihr.ac.uk/reports-and-resources/horizon-scanning-reports/point-of-care-testing-for-urinary-tract-infections	Symptom burden, personal wellbeing, antibiotic resistance, patient satisfaction, treatment options	Personal wellbeing, patient satisfaction
Nik-Ahd, Ackerman & Anger (2018)	Nik-Ahd, F., Lenore Ackerman, A., & Anger, J. (2018). Recurrent Urinary Tract Infections in Females and the Overlap with Overactive Bladder. Current Urology Reports, 19(11). https://doi.org/10.1007/s11934-018-0839-3	Clinician education, clinician awareness, clinician understanding, UTI diagnosis	Patient satisfaction
O'Kelly et al. (2019)	O’Kelly, K., Phelps, K., Regen, E. L., Carvalho, F., Kondova, D., Mitchell, V., Conroy, S. P., & Jun, G. T. (2019). Why are we misdiagnosing urinary tract infection in older patients? A qualitative inquiry and roadmap for staff behaviour change in the emergency department. European Geriatric Medicine, 10(4), 585-593. https://doi.org/10.1007/s41999-019-00191-3	Misdiagnosis, clinician understanding, UTI diagnosis, clinician education, diagnostic challenges, antibiotic resistance	Patient satisfaction
Ohly (2003)	Ohly, N. (2003). Accuracy of negative dipstick urine analysis in ruling out urinary tract infection in adults. Emergency Medicine Journal, 20(4), 362-a-363. https://doi.org/10.1136/emj.20.4.362-a	Misdiagnosis, clinician understanding, UTI diagnosis, clinician education, diagnostic challenges, antibiotic resistance	Patient satisfaction
Oskay, Beji & Yalcin (2005)	Oskay, U. Y., Beji, N. K., & Yalcin, O. (2005). A study on urogenital complaints of postmenopausal women aged 50 and over. Acta Obstetricia et Gynecologica Scandinavica, 84(1), 72-78. https://doi.org/10.1080/j.0001-6349.2005.00645.x	Sexual wellbeing, sexual impact, sexual satisfaction, sexual desire, relationships, pain, stress, incontinence	Sexual wellbeing
Padmadas, Stones & Matthews (2006)	Padmadas, S. S., Stones, R. W., & Matthews, Z. (2006). Dyspareunia and Urinary Sensory Symptoms in India: Population‐Based Study. The Journal of Sexual Medicine, 3(1), 114-120. https://doi.org/https://doi.org/10.1111/j.1743-6109.2005.00103.x	Sexual wellbeing, sexual impact, pain, stress	Sexual wellbeing, personal wellbeing
Paydas Hataysal et al. (2018)	Paydaş Hataysal, E., Saraçlıgil, B., Türk Dağı, H., & Vatansev, H. (2018). How accurate is the urine dipstick test for diagnosing urinary tract infection? The European Research Journal. https://doi.org/10.18621/eurj.406215	Misdiagnosis, clinician understanding, UTI diagnosis, clinician education, diagnostic challenges, antibiotic resistance	Patient satisfaction
Poochikian-Sarkissian et al. (2010)	Poochikian-Sarkissian, S., Sidani, S., Ferguson-Pare, M., & Doran, D. (2010). Examining the relationship between patient-centred care and outcomes. Canadian journal of neuroscience nursing, 32, 14-21.	Patient-centred care, patient satisfaction	Patient satisfaction
Price et al. (2018)	Price, T. K., Hilt, E. E., Dune, T. J., Mueller, E. R., Wolfe, A. J., & Brubaker, L. (2018). Urine trouble: should we think differently about UTI? International Urogynecology Journal, 29(2), 205-210. https://doi.org/10.1007/s00192-017-3528-8	Clinician education, clinician awareness, clinician understanding, UTI diagnosis, antibiotic resistance	Patient satisfaction
Renard et al. (2015)	Renard, J., Ballarini, S., Mascarenhas, T., Zahran, M., Quimper, E., Choucair, J., & Iselin, C. E. (2015). Recurrent Lower Urinary Tract Infections Have a Detrimental Effect on Patient Quality of Life: a Prospective, Observational Study. Infectious Diseases and Therapy, 4(1), 125-135. https://doi.org/10.1007/s40121-014-0054-6	General impact on quality of life, social impact, relationships, sexual impact, financial impact, societal financial impact, psychological wellbeing, depression, anxiety, work and daily activity disruption	Personal wellbeing, social wellbeing, sexual wellbeing, work and activity interference
Rich et al. (2019)	Rich, S. N., Klann, E. M., Almond, C. R., Larkin, E. M., Nicolette, G., & Ball, J. D. (2019). Associations between antibiotic prescriptions and recurrent urinary tract infections in female college students. Epidemiology and Infection, 147. https://doi.org/10.1017/s0950268818003369	Antibiotic resistance, antibiotic use, treatment access, treatment options, patient satisfaction	Patient satisfaction
Salonia et al. (2004)	Salonia, A., Zanni, G., Nappi, R. E., Briganti, A., Dehò, F., Fabbri, F., Colombo, R., Guazzoni, G., Di Girolamo, V., Rigatti, P., & Montorsi, F. (2004). Sexual Dysfunction is Common in Women with Lower Urinary Tract Symptoms and Urinary Incontinence: Results of a Cross-Sectional Study. European Urology, 45(5), 642-648. https://doi.org/https://doi.org/10.1016/j.eururo.2003.11.023	Sexual dysfunction	Sexual wellbeing
Schiavi et al. (2019)	Schiavi, M. C., Porpora, M. G., Vena, F., Prata, G., Sciuga, V., D’Oria, O., Di Tucci, C., Savone, D., Aleksa, N., Giannini, A., Nusiner, M. P., Zullo, M. A., Muzii, L., & Benedetti Panici, P. (2019). Orally Administered Combination of Hyaluronic Acid, Chondroitin Sulfate, Curcumin, and Quercetin in the Prevention of Postcoital Recurrent Urinary Tract Infections: Analysis of 98 Women in Reproduct…	Sex as cause of rUTI, treatment	Sexual wellbeing, patient satisfaction
Scott et al. (2015)	Scott, V. C. S., Haake, D. A., Churchill, B. M., Justice, S. S., & Kim, J.-H. (2015). Intracellular Bacterial Communities: A Potential Etiology for Chronic Lower Urinary Tract Symptoms. Urology, 86(3), 425-431. https://doi.org/10.1016/j.urology.2015.04.002	Clinician education, clinician awareness, clinician understanding, UTI diagnosis	Patient satisfaction
Scott et al. (2021)	Scott, V. C. S., Thum, L. W., Taylor, S., Markowitz, M., Maliski, S. L., Ackerman, L., Anger, J., & Kim, J.-H. (2021). Fear and frustration among women with recurrent urinary tract infections: Findings from patient focus groups. The Journal of Urology, 206, 1-7. https://doi.org/doi.org/10.1097/JU.0000000000001843	Frustration, distress, respect, dignity, antibiotic resistance, patient satisfaction, patient-doctor interaction	Patient satisfaction
Shallcross et al. (2018)	Shallcross, L., Gaskell, K., Fox-Lewis, A., Bergstrom, M., & Noursadeghi, M. (2018). Mismatch between suspected pyelonephritis and microbiological diagnosis: a cohort study from a UK teaching hospital. J Hosp Infect, 98(2), 219-222. https://doi.org/10.1016/j.jhin.2017.09.029	Testing methods, diagnostic challenges, patient satisfaction	Patient satisfaction
Shepherd & Pottinger (2013)	Shepherd, A. K., & Pottinger, P. S. (2013). Management of Urinary Tract Infections in the Era of Increasing Antimicrobial Resistance. Medical Clinics of North America, 97(4), 737-757. https://doi.org/https://doi.org/10.1016/j.mcna.2013.03.006	Antibiotic resistance, antibiotic use, treatment access, treatment options, patient satisfaction	Patient satisfaction
Shoskes (2012)	Shoskes, D. A. (2012). The Challenge of Erectile Dysfunction in the Man with Chronic Prostatitis/Chronic Pelvic Pain Syndrome. Current Urology Reports, 13(4), 263-267. https://doi.org/10.1007/s11934-012-0254-0	Sexual dysfunction in males	Sexual wellbeing
SIGN (2020)	SIGN. (2020). Management of suspected bacterial lower urinary tract infection in adult women (SIGN 160). https://www.sign.ac.uk/our-guidelines/management-of-suspected-bacterial-lower-urinary-tract-infection-in-adult-women/	Symptom burden, personal wellbeing, antibiotic resistance, patient satisfaction	Personal wellbeing, patient satisfaction
Soytas, Kactan & Guven (2020)	Soytas, M., Kactan, C., & Guven, S. (2020). Recurrent bladder cystitis: who takes the role? World Journal of Urology, 38(11), 2755-2760. https://doi.org/10.1007/s00345-020-03192-1	Patient-doctor interaction, clinician decisions, diagnostic challenges, patient satisfaction	Patient satisfaction
Stamm & Norby (2001)	Stamm, W. E., & Norrby, S. R. (2001). Urinary Tract Infections: Disease Panorama and Challenges. The Journal of Infectious Diseases, 183(s1), S1-S4. https://doi.org/10.1086/318850	Symptom burden, personal wellbeing, antibiotic resistance, patient satisfaction, treatment options, social impact, financial impact, quality of life	Personal wellbeing, patient satisfaction, social impact, work and activity interference
Stapleton et al. (1990)	Stapleton, A., Latham, R. H., Johnson, C., & Stamm, W. E. (1990). Postcoital Antimicrobial Prophylaxis for Recurrent Urinary Tract Infection: A Randomized, Double-blind, Placebo-Controlled Trial. JAMA, 264(6), 703-706. https://doi.org/10.1001/jama.1990.03450060049027	Sex as cause of rUTI, treatment	Sexual wellbeing, patient satisfaction
Steward et al. (1985	Steward, D. K., Wood, G. L., Cohen, R. L., Smith, J. W., & Mackowiak, P. A. (1985). Failure of the urinalysis and quantitative urine culture in diagnosing symptomatic urinary tract infections in patients with long-term urinary catheters. American Journal of Infection Control, 13(4), 154-160. https://doi.org/https://doi.org/10.1016/0196-6553(85)90102-6	Diagnostic challenges, patient satisfaction	Patient satisfaction
Swamy et al. (2018)	Swamy, S., Barcella, W., De Iorio, M., Gill, K., Khasriya, R., Kupelian, A. S., Rohn, J. L., & Malone-Lee, J. (2018). Recalcitrant chronic bladder pain and recurrent cystitis but negative urinalysis: What should we do? International Urogynecology Journal, 29(7), 1035-1043. https://doi.org/10.1007/s00192-018-3569-7	Diagnostic challenges, patient satisfaction, clinician awareness/understanding of testing and diagnostics, antibiotic resistance, treatment	Patient satisfaction
Vahlensieck et al. (2016)	Vahlensieck, W., Perepanova, T., Bjerklund Johansen, T. E., Tenke, P., Naber, K. G., & Wagenlehner, F. M. E. (2016). Management of Uncomplicated Recurrent Urinary Tract Infections. European Urology Supplements, 15(4), 95-101. https://doi.org/https://doi.org/10.1016/j.eursup.2016.04.007	Diagnostic challenges, patient satisfaction, clinician awareness/understanding of testing and diagnostics, antibiotic resistance, treatment	Patient satisfaction
Velmurugan & Sharmili (2022)	Velmurugan, R., & Sharmili, S. (2022). Urinary tract infection and its impact on sexual health. Urinary and Renal Research, 3(2). https://doi.org/10.54517/urr.v3i2.2124	Sexual dysfunction	Sexual wellbeing
Vincent et al. (2021)	Vincent, Y.-M., Frachon, A., Buffeteau, C., & Conort, G. (2021). Construction of a patient decision aid for the treatment of uncomplicated urinary tract infection in primary care. BMC Family Practice, 22(1). https://doi.org/10.1186/s12875-021-01374-3	Patient-doctor interaction, clinician decisions, diagnostic challenges, patient satisfaction	Patient satisfaction
Wagenlehner et al. (2018)	Wagenlehner, F., Wullt, B., Ballarini, S., Zingg, D., & Naber, K. G. (2018). Social and economic burden of recurrent urinary tract infections and quality of life: a patient web-based study (GESPRIT). Expert Review of Pharmacoeconomics & Outcomes Research, 18(1), 107-117. https://doi.org/10.1080/14737167.2017.1359543	General impact on quality of life, social impact, relationships, sexual impact, financial impact, societal financial impact, psychological wellbeing, depression, anxiety, work and daily activity disruption	Personal wellbeing, social wellbeing, sexual wellbeing, work and activity interference
Zahariou et al. (2010)	Zahariou, A., Karamouti, M., Tyligada, E., & Papaioannou, P. (2010). Sexual Function in Women With Overactive Bladder. Urogynecology, 16(1), 31-36. https://doi.org/10.1097/SPV.0b013e3181bf51eb	Sexual dysfunction	Sexual wellbeing
Zalmanovich et al. (2021)	Zalmanovich, A., Katzir, M., Chowers, M., Matar, A., Rodrig, J., & Alon, D. (2021). Improving urinary tract infection treatment through a multifaceted antimicrobial stewardship intervention in the emergency department. The American Journal of Emergency Medicine, 49, 10-13. https://doi.org/10.1016/j.ajem.2021.05.037	Antibiotic resistance, antibiotic use, treatment access, treatment options, patient satisfaction	Patient satisfaction
Zeng et al. (2022)	Zeng, Z., Zhan, J., Zhang, K., Chen, H., & Cheng, S. (2022). Global, regional, and national burden of urinary tract infections from 1990 to 2019: an analysis of the global burden of disease study 2019. World J Urol, 40(3), 755-763. https://doi.org/10.1007/s00345-021-03913-0	Personal wellbeing, burden, societal burden, financial implications, patient satisfaction, work and activity interference, social burden	Personal wellbeing, patient satisfaction, social impact, work and activity interference
Zhang et al. (2013)	Zhang, C., Hai, T., Yu, L., Liu, S., Li, Q., Zhang, X., Xu, T., & Wang, X. (2013). Association between occupational stress and risk of overactive bladder and other lower urinary tract symptoms: A cross-sectional study of female nurses in China [https://doi.org/10.1002/nau.22290]. Neurourology and Urodynamics, 32(3), 254-260. https://doi.org/https://doi.org/10.1002/nau.22290	Work and activity interference, occupational stress	Work and activity interference
Zhang et al. (2022)	Zhang, Z., Zhu, X., Wang, Y., Chen, D., Fan, J., Deng, C., Liu, G., Yang, L., Feloney, M., Wang, X., & Zhang, Y. (2022). Sexual dysfunction associated with chronic retention of foreign bodies in the low urinary tract [https://doi.org/10.1111/and.14346]. Andrologia, 54(3), e14346. https://doi.org/https://doi.org/10.1111/and.14346	Sexual dysfunction	Sexual wellbeing
